# Supplementary material for: Electrochromic capacitive windows based on all conjugated polymers for a dual function smart window
Source: Royal Society of Chemistry journal article supplement (doi:10.1039/c8ee00080h), 2018-01-01
Supplement: c8ee00080h1.pdf [file c8ee00080h1.pdf]

Electronic Supplementary Material (ESI) for Energy & Environmental Science.

This journal is © The Royal Society of Chemistry 2015

## Supporting Information

### **Electrochromic capacitive windows based on all conjugated polymers for a dual function smart window**

*Younghoon Kim, Minsu Han, Jinbo Kim, Eunkyong Kim\**

Department of Chemical and Biomolecular Engineering, Yonsei University, 50 Yonsei-ro,

Seodaemun-gu, Seoul 03722, South Korea

Fax: +82-2-312-6401;

Tel: +82-2-2123-5752;

E-mail: eunkim@yonsei.ac.kr

#### **Supporting Information includes:**

Supporting Information Figures S1 to S11.

Supporting Information Tables S1 to S5.

Supplementary Video S1, S2.

Supporting Information References S1 to S4.

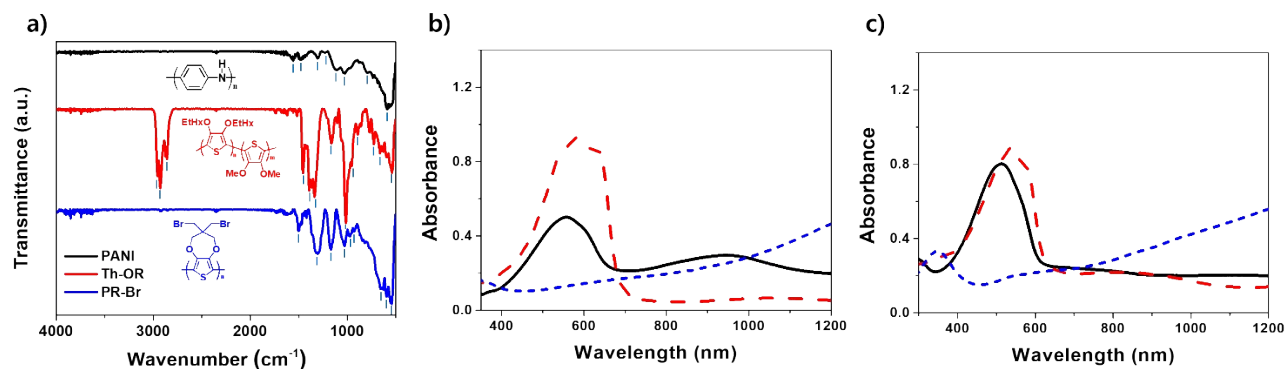

**Figure S1.** (a) FT-IR spectra of PANI (black), Th-OR (red), and PR-Br (blue), (b-c) UV-Vis spectra of the pristine (black line), fully doped (blue), and fully dedoped (red dashed line) polymeric films, (b) PR-Br, and (c) Th-OR.

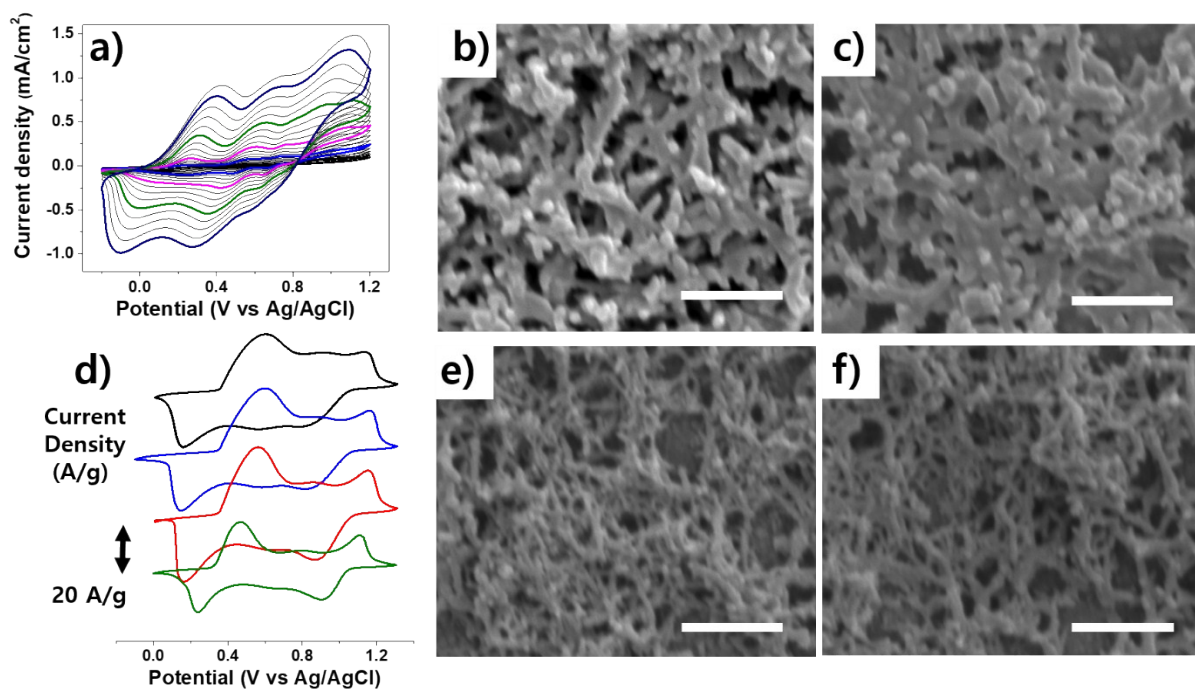

**Figure S2.** (a) Cyclic Voltammetry for electro-polymerization of aniline in 1 M H<sub>2</sub>SO<sub>4</sub>, 0.05 M aniline aqueous solution. SEM image of PANI film prepared with a scan rate of b) 20 mV/s, c) 50 mV/s, e) 100 mV/s, f) 200 mV/s (scale bar = 1 μm) and (d) CV of monomer free PANI film prepared with a scan rate of 20 mV/s (black), 50 mV/s (blue), 100 mV/s (red), 200 mV/s (green) in SPAn electrolyte, Ag/AgCl electrode and stainless steel were used as a reference electrode, counter electrode, respectively. The CV scan rate was 100 mV/s.

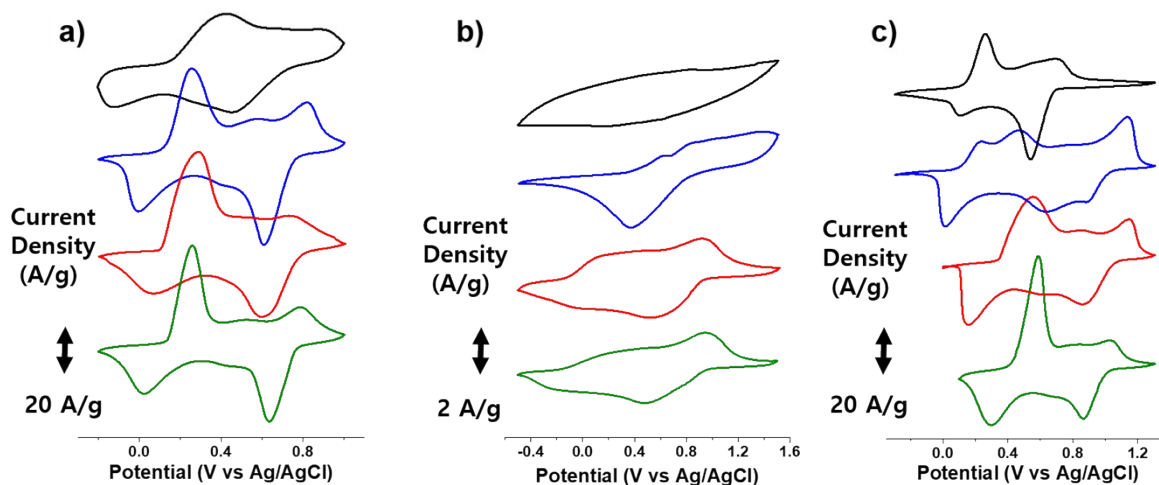

**Figure S3.** The cyclic voltammetry of the PANI film which was electrochemically polymerized using a potentiodynamic methods sweeping from  $-0.2$  V to  $1.2$  V at different sweep rate of  $20$  mV/s (black),  $50$  mV/s (blue),  $100$  mV/s (red),  $200$  mV/s (green) a) in  $\text{HClO}_4$   $1$  M,  $\text{NaClO}_4$   $3$  M of aqueous electrolyte, b) in Ionic liquid electrolyte containing 1-Butyl-3-methylimidazolium bis(trifluoromethylsulfonyl)imide. (scan rate =  $0.1$  V/s, PANI film, Ag/AgCl electrode and stainless steel wire was used as a working electrode, reference electrode and counter electrode, respectively) c) The cyclic voltammetry of the PANI film in different acidic organic electrolyte condition of  $0.1$  M p-toluenesulfonic acid (black),  $0.1$  M trifluoroacetic acid (blue),  $0.1$  M dodecylbenzene sulfonic acid (red), d)  $0.1$  M perchloric acid (green), all the electrolyte containing  $0.3$  M sodium perchlorate for ionic conduction. PANI film for (c) was electrochemically polymerized using a potentiodynamic methods sweeping from  $-0.2$  V to  $1.2$  V at different sweep rate of  $100$  mV/s

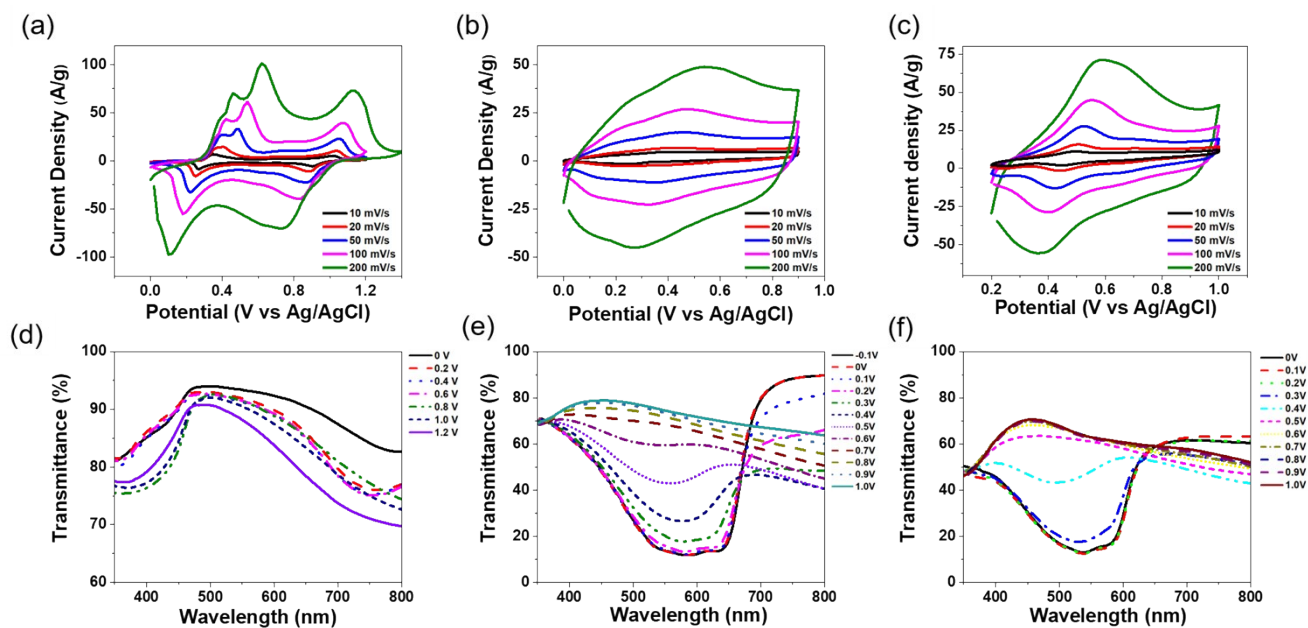

**Figure S4.** Cyclic voltammetry (a–c) and in-situ spectroelectrochemistry (d–f) of PANI\_2 (thickness : 25 nm) (a, d), PR-Br\_1 (thickness : 170 nm) (b, e), Th-OR\_2 (thickness : 210 nm) (c,f) at given sweep rate and at given voltage. (electrolyte was 0.1 M HClO<sub>4</sub>, 0.3 M NaClO<sub>4</sub> in acetonitrile solution (SPAN), Ag/AgCl reference electrode and stainless steel wire were used as an electrolyte, reference electrode and counter electrode, respectively

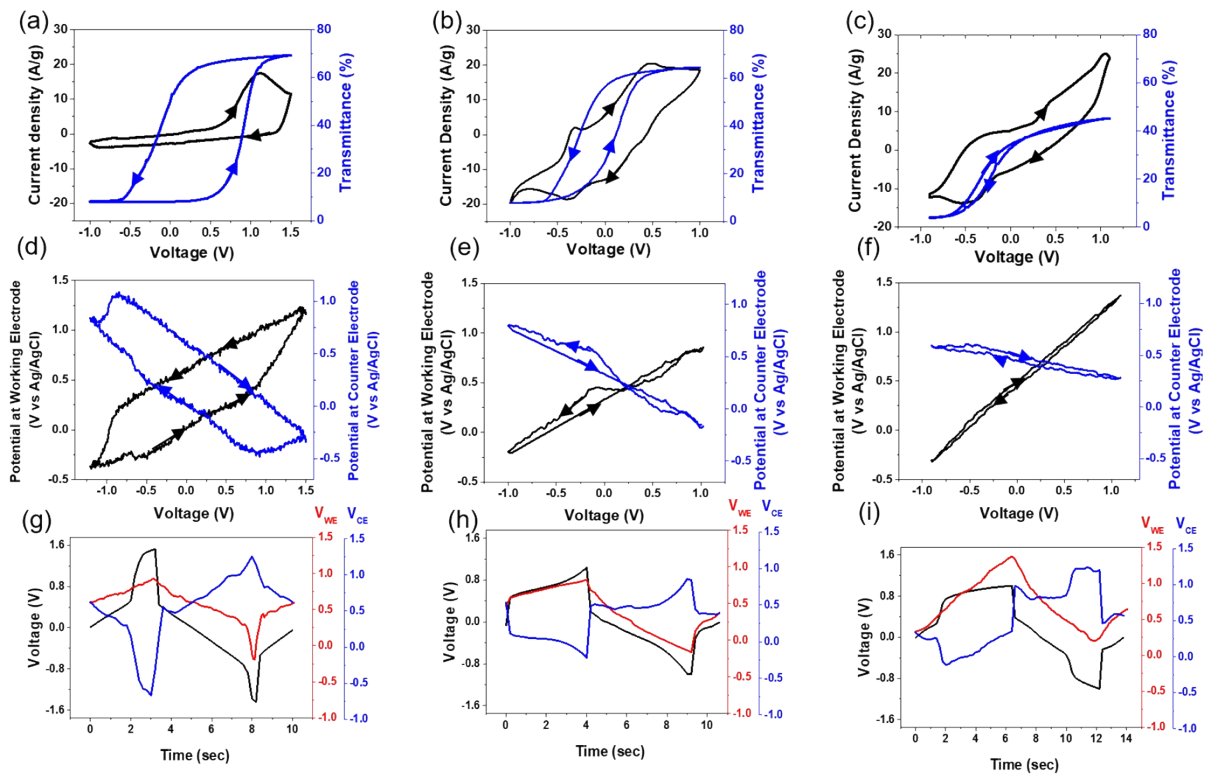

**Figure S5.** Cyclic voltammetry (black) and corresponding transmittance (blue,  $\lambda = 580$  nm) of (a) PR-Br (170 nm)//SPAn//PANI(11 nm), (b) PR-Br (170nm)//SPAn//PANI(25 nm) (c) PR-Br (170 nm)//SPAn//PANI (47 nm) and corresponding potential at each electrode (d–f), and charging-discharging graph (g–i) of devices (black) and potential at each electrode (red line : WE (PR-Br), blue line : CE (PANI))

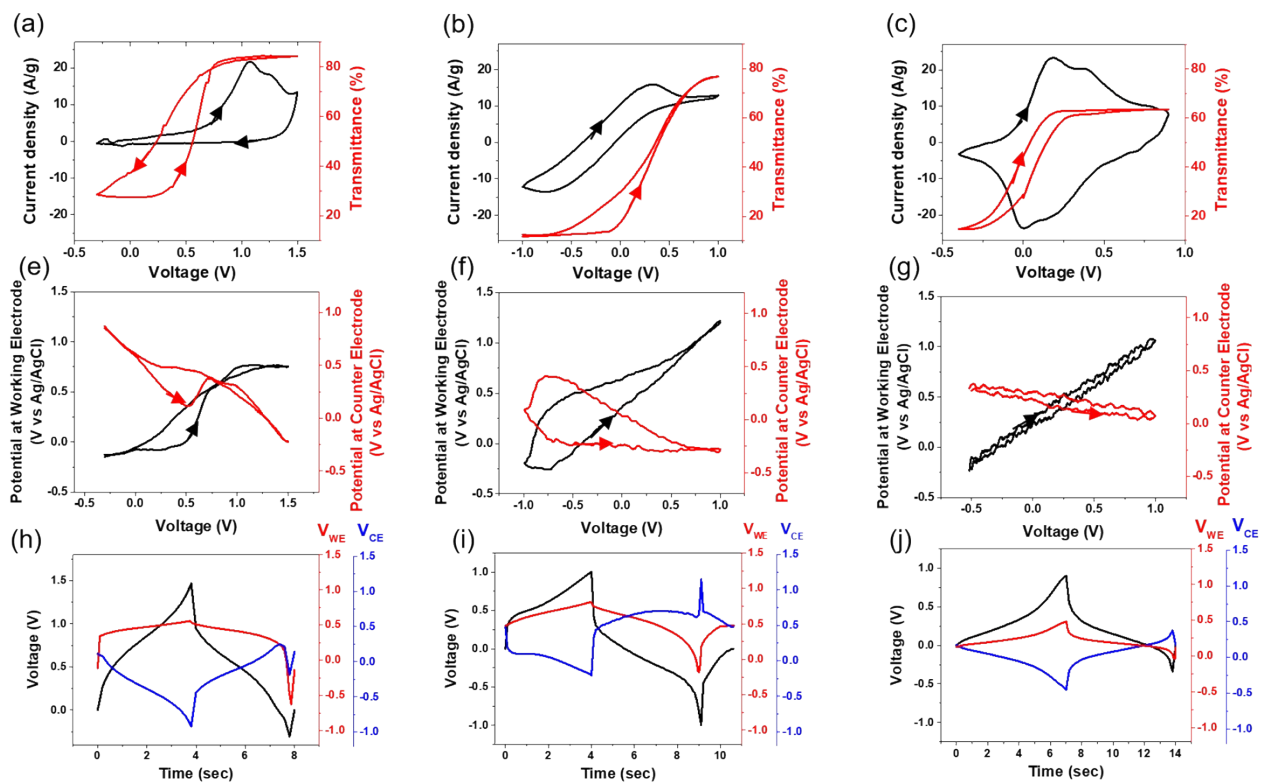

**Figure S6.** Cyclic voltammety (black) and corresponding transmittance (red,  $\lambda = 532$  nm) of (a) Th-OR (210 nm)//SPAn//PANI(11 nm), (b) Th-OR (210nm)//SPAn//PANI(25 nm) (c) Th-OR (210 nm)//SPAn//PANI (47 nm) and corresponding potential at each electrode, and charging-discharging graph of devices (black) and potential at each electrode (red line : WE (Th-OR), blue line : CE (PANI))

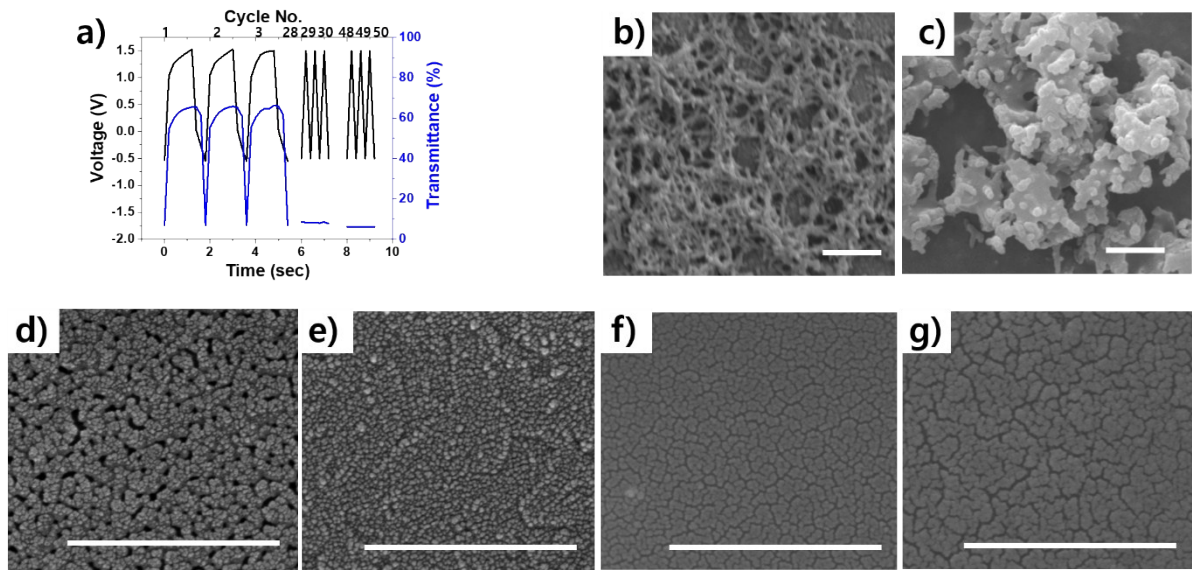

**Figure S7.** (a) Cycle stability of the BECC with  $d_{PANI} = 11$  nm with SPAn containing 5 wt% PMMA as an electrolyte SEM image of PANI layer of (b) pristine state, and (c) after 120 cycles of operation, PR-Br layer of (d) pristine state, and (e) after 120 cycles of operation, Th-OR layer of (f) pristine state, and (g) after 120 cycles of operation. (scale bar = 1  $\mu$ m)

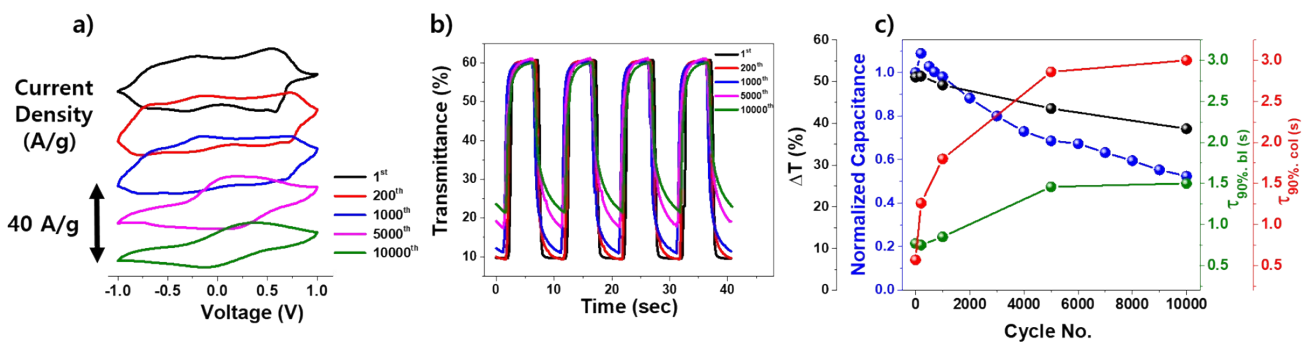

**Figure S8.** (a) The cyclic voltammety of the BECCP5 and (b) the optical response time at an applied potential between 1 V ~ -1 V: after 1<sup>st</sup> cycle (black), 200<sup>th</sup> cycle (red), 1000<sup>th</sup> cycle (blue), 5000<sup>th</sup> cycle (magenta), 10000<sup>th</sup> cycle (green). (c) The change in color contrast ( $\Delta T$ ) at 580 nm (black), normalized capacitance (blue), response time to reach 90 % of the maximum transmittance at bleaching step ( $\tau_{90\% \text{ bl}}$ , green), and at coloring step ( $\tau_{90\% \text{ col}}$ , red) over time.

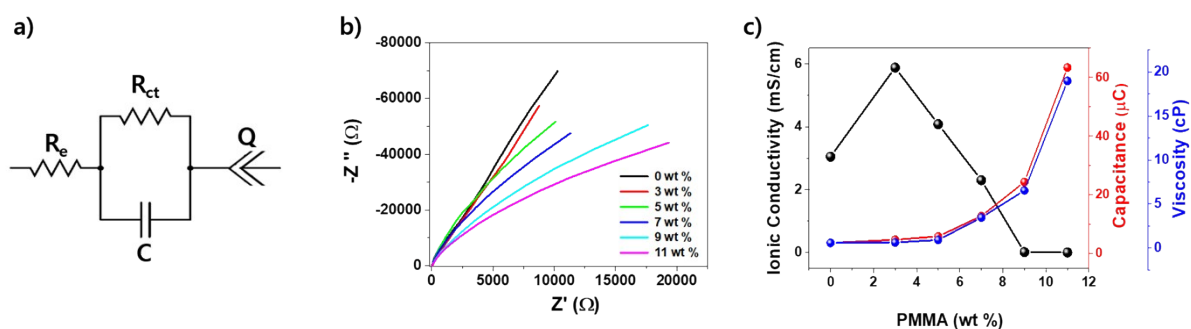

**Figure S9.** (a) equivalent circuit model consist of bulk electrolyte resistance ( $R_e$ ), charge transport resistance ( $R_{ct}$ ), capacitance ( $C$ ), and constant phase element ( $Q$ ) (b)Nyquist EIS spectrum of the device consisted of ITO//electrolyte //ITO, electrolyte was SPAn containing 0 wt% (black), 3 wt% (red), 5 wt% (green), 7 wt% (blue), 9 wt% (cyan), 11 wt% (magenta) of PMMA. (c) resulting ionic conductivity (black), capacitance (red), and viscosity (blue) of the SPAn containing different PMMA concentration.

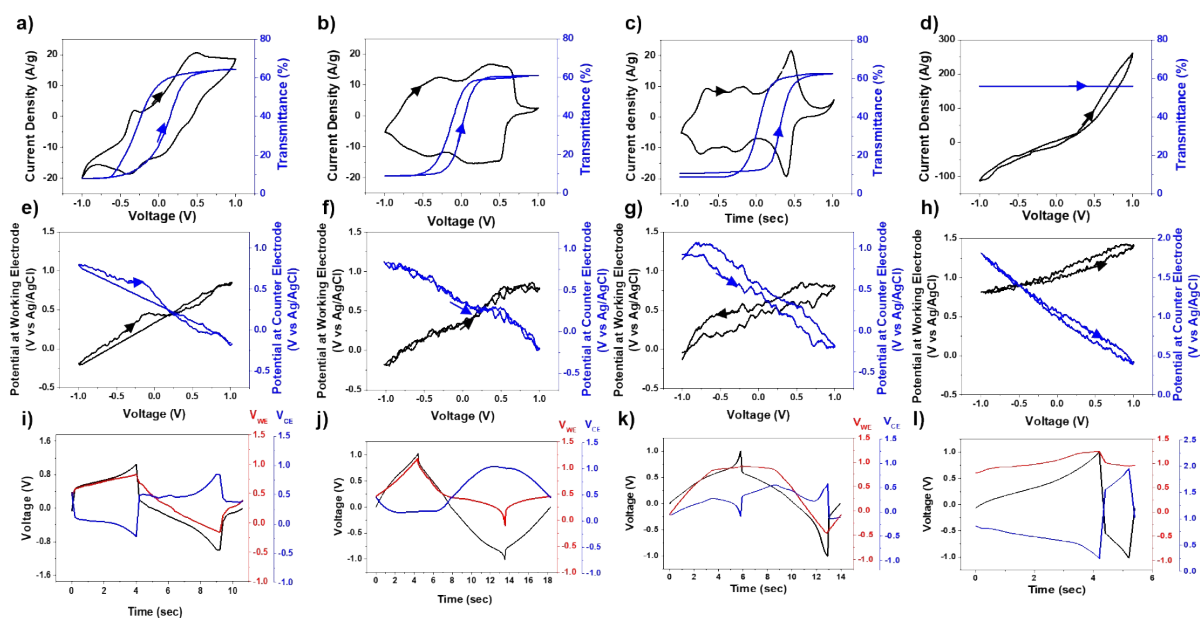

**Figure S10.** Cyclic voltammety (black) and corresponding transmittance (blue,  $\lambda = 580\text{nm}$ ) of PR-Br (170 nm)//PANI(25 nm) with SPAn electrolyte containing (a) 0 wt%, (b) 5 wt% (c) 7 wt% (d) 9 wt% of PMMA and corresponding potential at each electrode (e-h). Charging-discharging graph (i-l) of the devices (black) and potential at each electrode (red line : WE (PR-Br), blue line : CE (PANI)) (charging/discharging current was 0.7 mA)



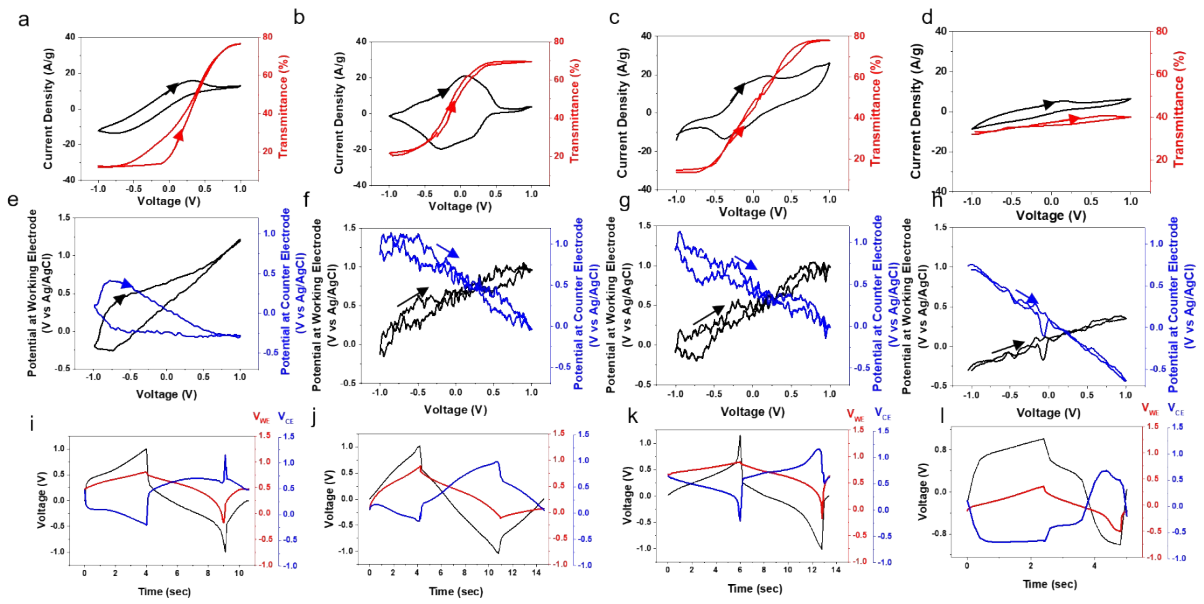

**Figure S11.** Cyclic voltammetry (black) and corresponding transmittance (blue,  $\lambda = 532\text{nm}$ ) of Th-OR (210 nm)/PANI (25 nm) with SPAN electrolyte containing (a) 0 wt%, (b) 5 wt% (c) 7 wt% (d) 9 wt% of PMMA and corresponding potential at each electrode (d–f). Charging-discharging graph (i–l) of the devices (black) and potential at each electrode (red line : WE (Th-OR), blue line : CE (PANI)) (charging/discharging current was 0.7 mA)

**Table S1** Electrochromic electrode fabrication condition

| Sample  | Coating rate (rpm) | Spray coating time (sec) | $\Delta T_{\lambda_{\max}}$ (%) <sup>a</sup> | $T_{\lambda_{\max},bl}$ (%) | $T_{\lambda_{\max},col}$ (%) | Thickness (nm) <sup>b</sup> |
|---------|--------------------|--------------------------|----------------------------------------------|-----------------------------|------------------------------|-----------------------------|
| PR-Br_1 | 1400               |                          | 61                                           | 72                          | 11                           | 170                         |
| PR-Br_2 | 2000               |                          | 48                                           | 81                          | 23                           | 100                         |
| PR-Br_3 | 800                |                          | 54                                           | 61                          | 7.3                          | 250                         |
| Th-OR_1 |                    | 3                        | 43                                           | 89                          | 48                           | 130                         |
| Th-OR_2 |                    | 5                        | 56                                           | 69                          | 13                           | 210                         |
| Th-OR_3 |                    | 10                       | 51                                           | 45                          | 2                            | 270                         |

<sup>a</sup> $\lambda_{\max}$  of blue, red polymeric layer was 580 nm, 532 nm, respectively. <sup>b</sup>determined from alpha-step.

**Table S2.** The FT-IR band assignments for PANI<sup>S1, 2</sup>, Th-OR<sup>S3</sup>, and PR-Br<sup>S4</sup>

| PANI <sup>S1, S2</sup>         |                                          | Th-OR <sup>S3</sup>            |                                                     | PR-Br <sup>S4</sup>            |                            |
|--------------------------------|------------------------------------------|--------------------------------|-----------------------------------------------------|--------------------------------|----------------------------|
| Wavenumber (cm <sup>-1</sup> ) | Functional Group                         | Wavenumber (cm <sup>-1</sup> ) | Functional Group                                    | Wavenumber (cm <sup>-1</sup> ) | Functional Group           |
| 1558                           | C=N stretching (quinoid form)            | 2958, 2927, 2856               | C-H stretching (CH <sub>2</sub> , CH <sub>3</sub> ) | 1500, 1305                     | Aromatic C=C stretching    |
| 1489                           | C=C stretching (benzoid form)            | 1456, 1392, 1336               | Aromatic C=C stretching                             | 1167                           | C-H bending                |
| 1306, 1232                     | C-N stretching (benzoid form)            | 1162                           | C-H bending                                         | 1029                           | C(ring)-O-C stretching     |
| 1113                           | C-N stretching (quinoid form)            | 1014                           | C(ring)-O-C stretching                              | 926, 655, 542                  | C-S bond in thiophene ring |
| 1024                           | C=NH <sup>+</sup> bending (quinoid form) | 727                            | -(CH <sub>2</sub> ) <sub>n</sub> -bending           | 597                            | C-Br stretching            |
| 792                            | C-H out of plane bending                 | 952, 663, 540                  | C-S bond in thiophene ring                          |                                |                            |
| 588                            | Aromatic ring deformation                |                                |                                                     |                                |                            |

**Table S3.** The gravitational capacitance of the PANI in different condition. All the measurement was done by sweep rate of 100 mV/s

| Specific Capacitance (F/g)                   |     | Electrolyte                          |                            |             |            |                                  |              |
|----------------------------------------------|-----|--------------------------------------|----------------------------|-------------|------------|----------------------------------|--------------|
|                                              |     | Non-aqueous electrolyte <sup>a</sup> |                            |             |            | Aqueous Electrolyte <sup>b</sup> | Ionic Liquid |
|                                              |     | 0.1 M HClO <sub>4</sub>              | 0.1 M CF <sub>3</sub> COOH | 0.1 M p-TSA | 0.1 M DBSA | 1 M HClO <sub>4</sub>            | [Bmim]TFSI   |
| Polymerization Scan Rate <sup>c</sup> (mV/s) | 20  | 223                                  |                            |             |            | 252                              | 14           |
|                                              | 50  | 324                                  |                            |             |            | 325                              | 12.7         |
|                                              | 100 | 331                                  | 322                        | 225         | 285        | 355                              | 17.2         |
|                                              | 200 | 118                                  |                            |             |            | 118                              | 13.9         |

<sup>a</sup>acetonitrile solution containing 0.3 M NaClO<sub>4</sub> for ionic conduction <sup>b</sup>aqueous solution containing 3 M NaClO<sub>4</sub> for ionic conduction <sup>c</sup>electro-polymerization scan rate for aniline in 1 M H<sub>2</sub>SO<sub>4</sub>, 0.05 M aniline.

**Table S4.** The resistances, capacitances, and viscosity of SPAn electrolyte containing different PMMA concentration.

| PMMA conc. (wt%) | $R_e$ [ $\Omega$ ] | $R_{ct}$ [ $\Omega$ ] | $\sigma$ [S/cm]       | C [ $\mu$ F] | Q [ $\mu$ F] | $\chi^2$ | Viscosity (cP)       |
|------------------|--------------------|-----------------------|-----------------------|--------------|--------------|----------|----------------------|
| 0                | 38.98              | 1.31                  | $3.05 \times 10^{-3}$ | 3.63         | 20.4         | 0.010    | 0.578 ( $\pm 0.06$ ) |
| 3                | 55.32              | 0.68                  | $5.88 \times 10^{-3}$ | 4.73         | 26.5         | 0.005    | 0.625 ( $\pm 0.07$ ) |
| 5                | 35.96              | 0.98                  | $4.08 \times 10^{-3}$ | 5.86         | 26.5         | 0.007    | 0.92 ( $\pm 0.1$ )   |
| 7                | 39.74              | 1.74                  | $2.30 \times 10^{-3}$ | 12.8         | 29.8         | 0.017    | 3.46 ( $\pm 0.6$ )   |
| 9                | 58.72              | 264                   | $1.52 \times 10^{-5}$ | 24.4         | 28.4         | 0.003    | 6.54 ( $\pm 0.7$ )   |
| 11               | 42.75              | 1344                  | $2.98 \times 10^{-6}$ | 63.4         | 41.2         | 0.001    | 18.98                |

**Table S5.** Electrochromic capacitive window properties in this study.

| Sample Name | PR-Br (nm) | Th-OR (nm) | PANI (nm) | PMMA (wt%) <sup>a</sup> | Cap (mF) <sup>b</sup> | Cap (mF) <sup>c</sup> | Energy Density (Wh/kg)  | Power density (kW/kg)   | CoulE (%)    | $\Delta T$ (%) <sup>d</sup> | $E_{WE}$ (V) <sup>e</sup> | $E_{CE}$ (V) <sup>e</sup> | Conductivity (S/m) <sup>f</sup> | Viscosity (cP) |
|-------------|------------|------------|-----------|-------------------------|-----------------------|-----------------------|-------------------------|-------------------------|--------------|-----------------------------|---------------------------|---------------------------|---------------------------------|----------------|
| BECC1       | 170        |            | 11        | 0                       | 1.15                  | 0.72<br>0.9           | 5.3 (bl)<br>6.3 (col)   | 37.2 (bl)<br>19.2 (col) | 56.3<br>55.3 | 61                          | 0.56<br>0.8               | -0.44<br>-0.2             | 0.305                           | 0.58           |
| BECC2       | 170        |            | 25        | 0                       | 2.48                  | 0.6<br>0.84           | 1.0 (bl)<br>1.2 (col)   | 14.1 (bl)<br>12.0 (col) | 25<br>33.3   | 57                          | 0.86<br>0.83              | -0.14<br>-0.17            | 0.305                           | 0.58           |
| BECC3       | 170        |            | 47        | 0                       | 2.01                  | 1.2<br>0.96           | 2.3 (bl)<br>1.5 (col)   | 13.7 (bl)<br>2.75 (col) | 31.3<br>42.1 | 41                          | 1.28<br>1.37              | 0.28<br>-0.37             | 0.305                           | 0.58           |
| BECCP5      | 170        |            | 25        | 5                       | 3.80                  | 2.04<br>2.88          | 9.7 (bl)<br>13.5 (col)  | 75.3 (bl)<br>58.8 (col) | 77.2<br>84.2 | 51                          | 0.86<br>1.17              | -0.14<br>0.17             | 0.408                           | 0.92           |
| BECCP7      | 170        |            | 25        | 7                       | 3.00                  | 2.58<br>0.6           | 9.6 (bl)<br>1.1 (col)   | 29.3 (bl)<br>15.6 (col) | 74.1<br>35.7 | 54                          | 0.82<br>0.91              | -0.18<br>-0.09            | 0.230                           | 3.5            |
| BECCP9      | 170        |            | 25        | 9                       | 3.66                  | 0.06<br>0.12          | 1.04 (bl)<br>2.44 (col) | 29.3 (bl)<br>15.6 (col) | 2.4<br>25    | 0                           | 1.42<br>1.25              | 0.42<br>0.25              | 0.002                           | 6.5            |
| RECC1       |            | 210        | 11        | 0                       | 1.44                  | 1.36<br>0.4           | 5.2 (bl)<br>0.33 (col)  | 19.2 (bl)<br>5.83 (col) | 89.5<br>50   | 57                          | 0.66<br>0.49              | -0.34<br>-0.51            | 0.305                           | 0.58           |
| RECC2       |            | 210        | 25        | 0                       | 1.53                  | 0.9<br>0.4            | 1.92 (bl)<br>2.08 (col) | 21.1 (bl)<br>21.8 (col) | 37.5<br>50   | 64                          | 1.22<br>0.80              | 0.22<br>-0.20             | 0.305                           | 0.58           |
| RECC3       |            | 210        | 47        | 0                       | 4.01                  | 4.67<br>0.3           | 5.25 (bl)<br>0.17 (col) | 24.8 (bl)<br>2.66 (col) | 74.3<br>12.5 | 49                          | 1.07<br>1.00              | 0.07<br>0                 | 0.305                           | 0.58           |
| RECCP5      |            | 210        | 25        | 5                       | 3.25                  | 1.44<br>2.28          | 5.33 (bl)<br>10.5 (col) | 27.8 (bl)<br>51.6 (col) | 57.1<br>86.3 | 60                          | 1.05<br>0.89              | 0.05<br>-0.11             | 0.408                           | 0.92           |
| RECCP7      |            | 210        | 25        | 7                       | 2.41                  | 1.26<br>0.36          | 2.5 (bl)<br>0.8 (col)   | 16.2 (bl)<br>13.2 (col) | 35<br>12.8   | 64.5                        | 1.04<br>0.90              | 0.04<br>-0.10             | 0.230                           | 3.5            |
| RECCP9      |            | 210        | 25        | 9                       | 0.69                  | 0.78<br>0.12          | 1.8 (bl)<br>3.2 (col)   | 3.99 (bl)<br>0.64 (col) | 54.2<br>18.2 | 7.1                         | 0.3<br>0.34               | -0.7<br>-0.66             | 0.002                           | 6.5            |

<sup>a</sup>the concentration of the PMMA (wt%) in the SPAn electrolyte, <sup>b</sup>determined from CV graph in Fig. S5a–c, S6a–c, S10a–d, S11a–d, <sup>c</sup>determined from CD graph in Fig S5g–i, S6g–i, S10i–l, S11i–l, <sup>d</sup>Transmittance change at 580 nm for BECC, at 532 nm for RECC, <sup>e</sup>potential at each electrode upon  $V_{ap}$  of 1 V, determined from CV graph (up), and CD graph (down), <sup>f</sup>Ionic conductivity was determined from the electrochemical impedance spectroscopy (EIS).

**Supplementary Video S1.** The movie of energy transfer from BECCs to a RECC.

**Supplementary Video S2.** The movie of energy transfer from BECCs to a red LED.

#### **Supporting Information references**

- S1. K. S. Ryu, B. W. Moon, J. Joo and S. H. Chang, *Polymer*, 2001, **42**, 9355-9360.
- S2. J. Dominic, T. David, A. Vanaja and K. K. Satheesh Kumar, *Eur. Polym. J.*, 2016, **85**, 236-243.
- S3. X. Hu and L. Xu, *Polymer*, 2000, **41**, 9147-9154.
- S4. J. Kim, J. You, B. Kim, T. Park and E. Kim, *Adv. Mater.*, 2011, **23**, 4168-4173.
